# Supplementary material
Source: HighWire-hosted journal article supplement (http://www.jneurosci.org/highwire/filestream/599541/field_highwire_adjunct_files/1/Suppl_Tables.pdf)
Supplement: Suppl_Tables.pdf [file Suppl_Tables.pdf]

**Supplementary Table 1: Action potential durations of VTA neurons sort by projection target**

|                                         | All Cells <sup>a</sup>       | TH(+) <sup>b</sup>           | <i>I<sub>h</sub></i> (+), TH(-) | <i>I<sub>h</sub></i> (-) <sup>c</sup> |
|-----------------------------------------|------------------------------|------------------------------|---------------------------------|---------------------------------------|
| <b>AMYG-<br/>projecting<sup>d</sup></b> | <b>1.67 ± .07<br/>(n=31)</b> | <b>1.74 ± .07<br/>(n=11)</b> | <b>1.61 ± .15<br/>(n=5)</b>     | <b>1.35 ± .11<br/>(n=4)</b>           |
| <b>PFC-<br/>projecting</b>              | <b>2.03 ± .10<br/>(n=49)</b> | <b>2.03 ± .11<br/>(n=18)</b> | <b>2.23 ± .44<br/>(n=6)</b>     | <b>2.13 ± .17<br/>(n=10)</b>          |
| <b>NAc-<br/>projecting<sup>e</sup></b>  | <b>2.39 ± .16<br/>(n=50)</b> | <b>2.71 ± .19<br/>(n=20)</b> | <b>1.71 ± .10<br/>(n=5)</b>     | <b>1.48 ± .13<br/>(n=3)</b>           |
| <b>*older AMYG-<br/>projecting</b>      | <b>1.62 ± .09<br/>(n=15)</b> | <b>1.95 ± .09<br/>(n=5)</b>  | <b>1.63 ± .13<br/>(n=5)</b>     | <b>1.55 ± .18<br/>(n=3)</b>           |

<sup>a</sup>AMYG-projecting v NAc-projecting  $P < 0.001$

<sup>b</sup>AMYG-projecting v NAc-projecting  $P < 0.001$ ; PFC v NAc  $P < 0.01$

<sup>c</sup>AMYG-projecting v PFC-projecting  $P < 0.05$

<sup>d</sup>AMYG-projecting TH(+) v *I<sub>h</sub>*(-)  $P < 0.05$

<sup>e</sup>NAc-projecting TH(+) v *I<sub>h</sub>*(+), TH(-)  $P < 0.05$ ; TH(+) v *I<sub>h</sub>*(-)  $P < 0.05$

\*older AMYG-projecting neurons were not included in statistical comparisons

**Supplementary Table 2: Changes in membrane potential in response to quinpirole (1  $\mu$ M) vary by projection target**

|                        | TH(+) <sup>a</sup>                                   | TH(-)                                               |
|------------------------|------------------------------------------------------|-----------------------------------------------------|
| <b>AMYG-projecting</b> | <b>2.3 <math>\pm</math> 1.5 mV</b><br><b>(n=7)</b>   | <b>0.02 <math>\pm</math> 1.4 mV</b><br><b>(n=7)</b> |
| <b>PFC-projecting</b>  | <b>-4.4 <math>\pm</math> 1.9 mV</b><br><b>(n=9)</b>  | <b>-0.5 <math>\pm</math> 3.2 mV</b><br><b>(n=4)</b> |
| <b>NAc-projecting</b>  | <b>-3.2 <math>\pm</math> 1.4 mV</b><br><b>(n=13)</b> | <b>-1.1 <math>\pm</math> 2.1 mV</b><br><b>(n=5)</b> |

<sup>a</sup>AMYG-projecting v PFC-projecting  $P < 0.05$
